# Supplementary material for: Characterization of Polyethylene-Graft-Sulfonated Polyarylsulfone Proton Exchange Membranes for Direct Methanol Fuel Cell Applications
Source: MDPI journal article supplement (doi:10.3390/membranes5040875), 2015-12-04
Supplement: s1 [file s1]

## Supplemental Information

Determination of Methanol Concentration from Refractive Index.

A calibration curve of methanol concentration vs. RI value was pre-determined by several reference solutions. The experimental results are shown in the following Table S1 and Figure S1.

**Table S1.** Summary of RI value for five methanol concentrations in DI water.

| Run | Methanol Concentration in Deionized Water (M) | del RI Value           |
|-----|-----------------------------------------------|------------------------|
| 1   | 0                                             | $-1.55 \times 10^{-7}$ |
| 2   | 0.005                                         | $3.14 \times 10^{-6}$  |
| 3   | 0.01                                          | $6.55 \times 10^{-6}$  |
| 4   | 0.02                                          | $1.32 \times 10^{-5}$  |
| 5   | 0.04                                          | $2.61 \times 10^{-5}$  |

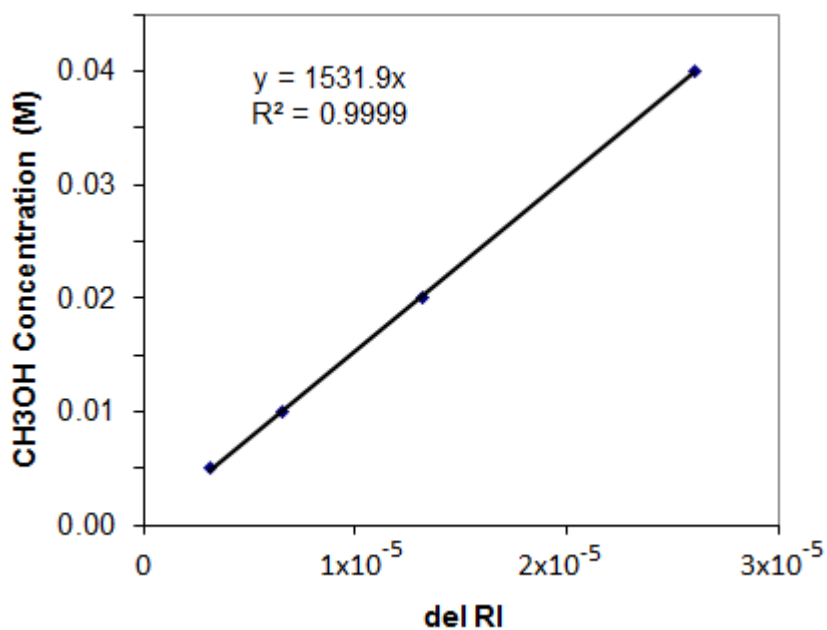

**Figure S1.** Plot of methanol concentration vs. del RI value.
